# Supplementary material
Source: PubMed Central journal article supplement (PMC11551519)
Supplement: NIHMS2017454-supplement-2.pdf [file NIHMS2017454-supplement-2.pdf]

### Appendix 3

#### Statements Reviewed in Second Delphi Committee Review and Scores

1. In a basic classification system, each eye should be scored to create a person level score that reflects the risks associated with visual loss found in the simplified AREDS classification system.
2. In a basic classification system, an eye with no drusen and no hyper- or hypo-pigmentary abnormalities (unless explained by another disease) within 2 DD of the fovea should be classified as having "No AMD". (0 points for this eye)
3. In a basic classification system, an eye with only small ( $<63\mu$ ) drusen and no hyper- or hypo-pigmentary abnormalities (unless explained by other disease) within 2 DD of the fovea should be classified as having "Normal Aging Changes". (0 points for this eye)
4. In a basic classification system, an eye with hyper- or hypo-pigmentary abnormalities within 2 DD of the fovea (unexplained by other disease) has AMD and is at risk for developing late AMD. (1 point for this eye)
5. In a basic classification system, an eye with large drusen ( $>125\mu$ ) within 2 DD of the fovea has AMD and is at risk for developing late AMD. (1 point for eye)
6. In a basic classification system, an eye with hyper- or hypo-pigmentary abnormalities within 2 DD of the fovea (unexplained by other disease), and large drusen ( $>125\mu$ ) within 2 DD of the fovea has AMD and can be considered to be at risk for developing late AMD. (2 points for eye)
7. In a basic classification system, an eye with apparent signs of macular neovascularization {often defined by associated signs (fluid, RPE elevation, hemorrhage, lipid, fibrosis, etc)}, and/or geographic atrophy (geographic atrophy is defined as punched out retinal lesion(s) with sharp edges and visible choroidal vessels) within 2 DD of the fovea, associated with any drusen in either eye, should be classified as having "Late AMD". (2 points for eye)
8. In a basic classification system, an eye with drusen between  $63\mu$  and  $\leq 125\mu$  has an increased risk of progressing to late AMD. (1/2 point for eye)
9. In a basic classification system, if one eye has late AMD, the second eye with drusen between  $63\mu$  and  $\leq 125\mu$  has AMD and has an increased risk of progressing to late AMD. (1 point for the second eye)

**Scores**

| <b><u>Statement</u></b> | <b><u>Median</u></b> | <b><u>Appropriate</u></b> | <b><u>Consensus</u></b> |
|-------------------------|----------------------|---------------------------|-------------------------|
| 1.                      | 9                    | yes                       | yes                     |
| 2.                      | 9                    | yes                       | yes                     |
| 3.                      | 9                    | yes                       | yes                     |
| 4.                      | 8.5                  | yes                       | equivocal               |
| 5.                      | 9                    | yes                       | yes                     |
| 6.                      | 9                    | yes                       | yes                     |
| 7.                      | 9                    | yes                       | yes                     |
| 8.                      | 9                    | yes                       | yes                     |
| 9.                      | 9                    | yes                       | yes                     |
